# Supplementary material for: Design and evaluation of nano-biphasic ionic liquid systems having highly polar and low polar domains
Source: Royal Society of Chemistry journal article supplement (doi:10.1039/c3ra43876g), 2013-01-01
Supplement: c3ra43876g.pdf [file c3ra43876g.pdf]

## Electronic Supplementary Information

### Design and evaluation of nano-biphasic ionic liquid systems having highly polar and low polar domains

Satomi Taguchi, Takahiro Ichikawa, Takashi Kato, and Hiroyuki Ohno\*

#### Selection of dye molecules for polarity measurements

We have checked that these dyes shown below were not suitable for the evaluation of polarity in the present nano-biphasic IL system because these dyes were soluble in both IL (**1** and **2**). As seen in Fig. S1, dyes (a, b, and c) seem to be useful to analyse only upper IL phase, they were detected by spectroscopic measurements.

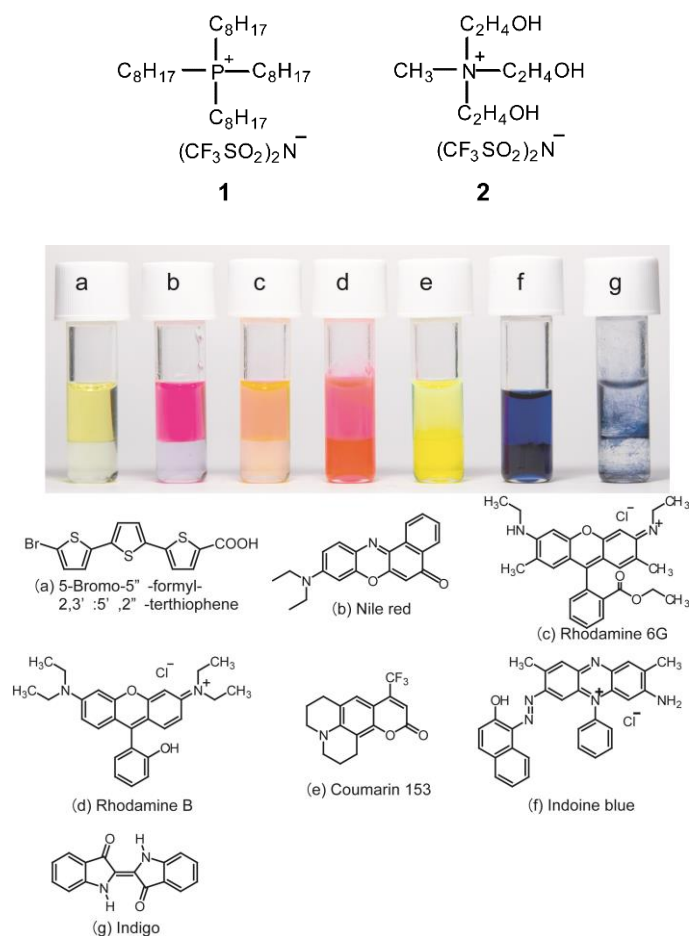

**Fig. S1** Structure of hydrophobic ionic liquid (IL) **1** and hydrophilic IL **2**. Photograph of the macro-segregated IL system composed of **1** and **2** containing various dyes: (a) 5-bromo-5''-formyl-2,3':5',2''-terthiophene, (b) Nile red, (c) rhodamine 6G, (d) rhodamine B, (e) coumarin 153, (f) Indoine blue and (g) indigo.

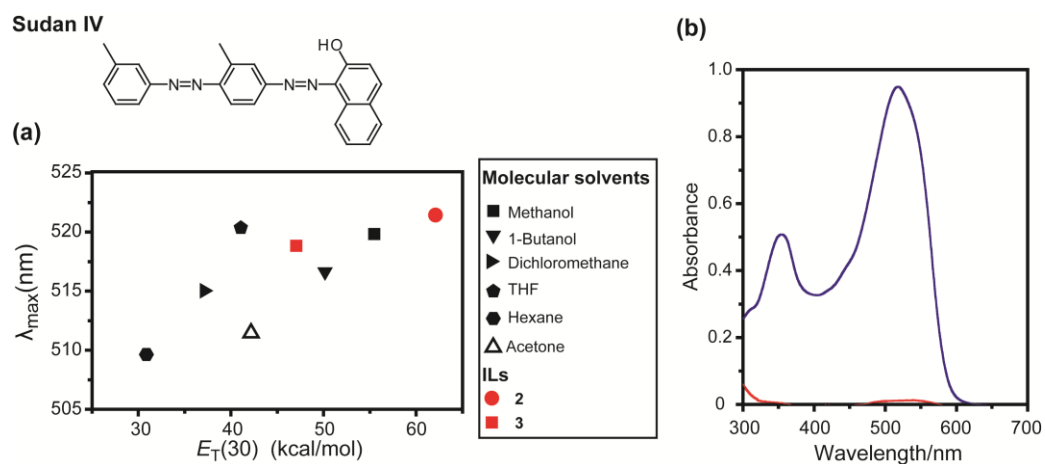

**Fig. S2** (a) Comparison of the value of  $E_T(30)$  in some conventional molecular solvents and ILs and the absorption peak of Sudan IV observed at around 510 nm ( $\lambda_{max}$ ). (b) UV-vis absorption Spectra of sudan IV in hydrophilic IL phase (red line) and hydrophobic IL phase (blue line) of the macro-separated IL system.

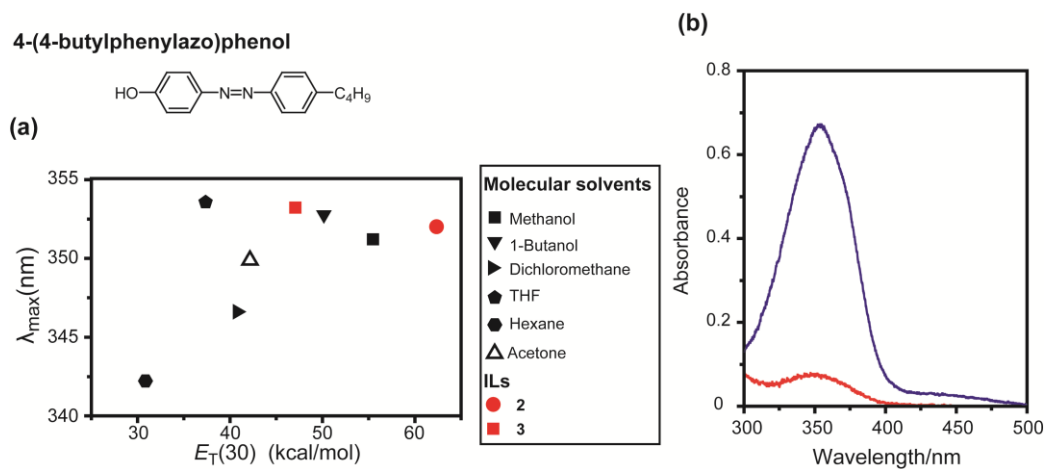

**Fig. S3** (a) Comparison of the value of  $E_T(30)$  in some conventional molecular solvents and ILs and the absorption peak of 4-(4-butylphenylazo)phenol at around 350 nm ( $\lambda_{max}$ ). (b) UV-vis absorption spectra of 4-(4-butylphenylazo)phenol in hydrophilic IL phase (red line) and hydrophobic IL phase (blue line) of the macro-separated IL system.

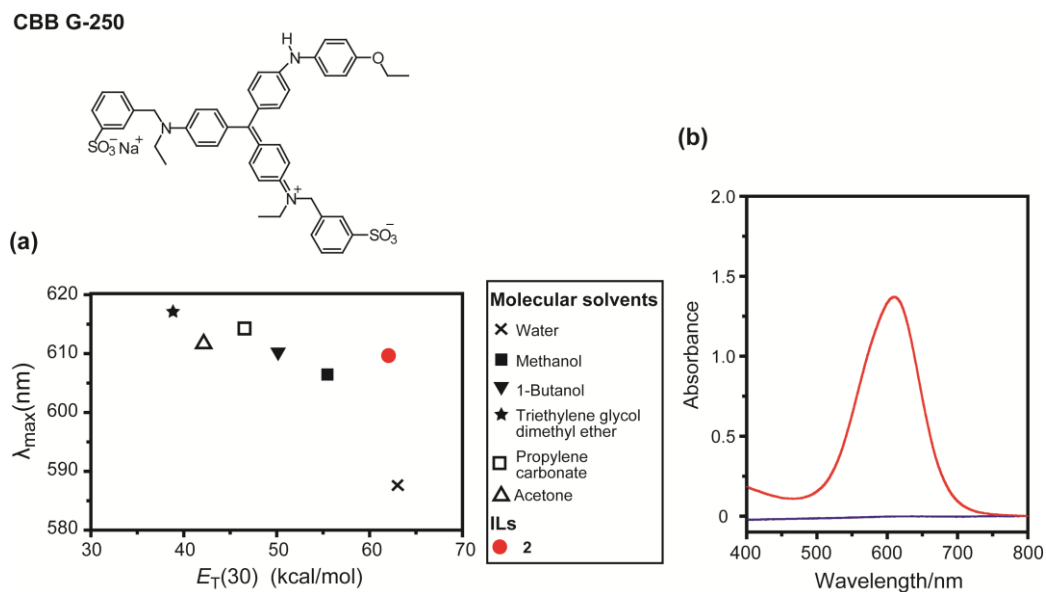

**Fig. S4** (a) Comparison of the value of  $E_T(30)$  in some conventional molecular solvents and IL2 and the absorption peak of CBB G-250 at around 600 nm ( $\lambda_{max}$ ). (b) UV-vis absorption spectra of CBB G-250 in hydrophilic IL phase (red line) and hydrophobic IL phase (blue line) of the macro-separated IL system.

### Phase diagram of the IL 2 and 3 mixture

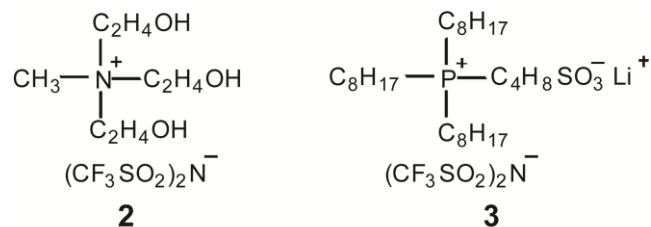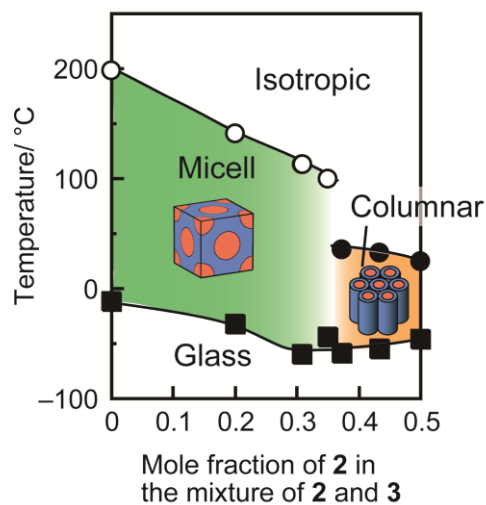

**Fig. S5** Phase diagram of the mixture of 2 and 3.

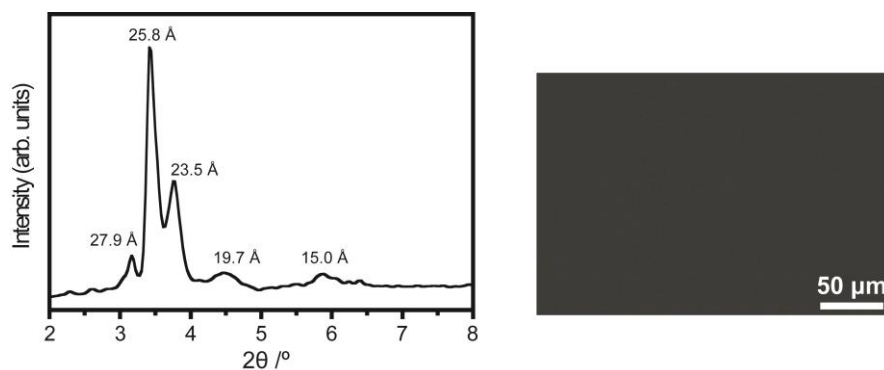

**Fig. S6** Small-angle X-ray scattering pattern and polarising optical micrograph of **2/3** mixture (mole fraction 0.35 for **2**) at 60 °C.

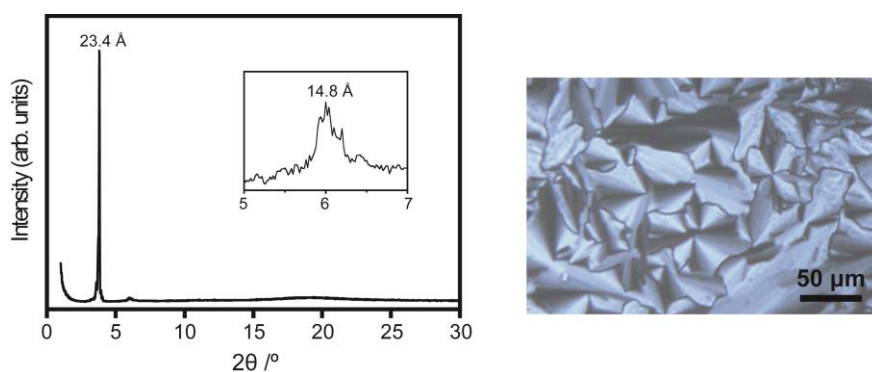

**Fig. S7** Wide-angle X-ray diffraction pattern and polarising optical micrograph of **2/3** mixture (mole fraction 0.5 for **2**) at 30 °C.

Nano-segregated structures of **2/3** mixtures were confirmed by X-ray measurement and polarising optical microscopic observation. The small-angle X-ray scattering pattern of **2/3** mixture (mole fraction 0.35 for **2**) at 60 °C shows five peaks (Fig. S6). On the other hand, the X-ray pattern of **2/3** mixture (mole fraction 0.5 for **2**) shows a considerably different X-ray pattern from that of **2/3** mixture (mole fraction 0.35 for **2**). For example, the wide angle X-ray diffraction pattern of **2/3** mixture (mole fraction 0.5 for **2**) at 30 °C shows one intense peak at 3.78° (23.4 Å) and one weak peak at 5.98° (14.8 Å) (Fig. S7). The reciprocal *d*-spacing ratio of the two peaks is 1 :  $\sqrt{3}$ , which can be assigned to the (100) and (110) reflections of a hexagonal columnar structure with the *p6mm* symmetry. Polarising optical microscopic observation for **2/3** mixture (mole fraction 0.5 for **2**) further supports the formation of the columnar structure.
